# Supplementary material
Source: PubMed Central journal article supplement (PMC6777599)
Supplement: CJN.01610219SupplementaryData.pdf [file CJN.01610219SupplementaryData.pdf]

## **SUPPLEMENTAL MATERIALS TABLE OF CONTENTS**

Supplemental Table 1. Adjusted Hazard Ratios for Incident PD Patient Outcomes by Time Period, with and without Adjustment for Facility PD Experience

Supplemental Table 2. Adjusted Hazard Ratios for Patient Characteristics, Pre-Reform and Reform Periods

Supplemental Table 1. Adjusted Hazard Ratios for Incident PD Patient Outcomes by Time Period, with and without Adjustment for Facility PD Experience

| Time Period<br>(ref. 2008, Jul-Dec) | Estimated Hazard Ratio (95% confidence intervals) |                                   |                                      |                                   |                                      |                                   |
|-------------------------------------|---------------------------------------------------|-----------------------------------|--------------------------------------|-----------------------------------|--------------------------------------|-----------------------------------|
|                                     | Discontinuation of PD                             |                                   | Mortality                            |                                   | Combined Outcomes                    |                                   |
|                                     | Without<br>Facility PD<br>Experience              | With<br>Facility PD<br>Experience | Without<br>Facility PD<br>Experience | With<br>Facility PD<br>Experience | Without<br>Facility PD<br>Experience | With<br>Facility PD<br>Experience |
| 2009, Jan-Jun                       | 0.96 (0.89-1.04)                                  | 0.96 (0.89-1.04)                  | 0.98 (0.87-1.10)                     | 0.98 (0.87-1.10)                  | 0.97 (0.91-1.04)                     | 0.97 (0.91-1.04)                  |
| 2009, Jul-Dec                       | 0.99 (0.92-1.06)                                  | 0.98 (0.91-1.06)                  | 1.01 (0.90-1.13)                     | 1.01 (0.90-1.13)                  | 1.00 (0.93-1.06)                     | 0.99 (0.93-1.06)                  |
| 2010, Jan-Jun                       | 0.97 (0.90-1.04)                                  | 0.97 (0.90-1.04)                  | 0.96 (0.86-1.08)                     | 0.96 (0.86-1.08)                  | 0.97 (0.91-1.03)                     | 0.97 (0.91-1.03)                  |
| 2010, Jul-Dec                       | 0.88 (0.82-0.95)                                  | 0.87 (0.81-0.94)                  | 0.95 (0.85-1.06)                     | 0.95 (0.85-1.06)                  | 0.90 (0.85-0.96)                     | 0.90 (0.84-0.95)                  |
| 2011, Jan-Jun                       | 0.94 (0.87-1.01)                                  | 0.93 (0.87-1.00)                  | 0.94 (0.84-1.05)                     | 0.94 (0.84-1.05)                  | 0.94 (0.89-1.00)                     | 0.94 (0.88-1.00)                  |
| 2011, Jul-Dec                       | 0.90 (0.83-0.96)                                  | 0.89 (0.83-0.95)                  | 0.90 (0.81-1.01)                     | 0.90 (0.81-1.01)                  | 0.90 (0.84-0.95)                     | 0.89 (0.84-0.95)                  |
| 2012, Jan-Jun                       | 0.88 (0.82-0.95)                                  | 0.87 (0.81-0.94)                  | 0.96 (0.86-1.07)                     | 0.96 (0.86-1.07)                  | 0.90 (0.85-0.96)                     | 0.90 (0.85-0.95)                  |
| 2012, Jul-Dec                       | 0.85 (0.79-0.91)                                  | 0.83 (0.78-0.90)                  | 0.98 (0.88-1.09)                     | 0.98 (0.89-1.09)                  | 0.89 (0.84-0.94)                     | 0.88 (0.83-0.94)                  |

Models included adjustments for other characteristics of patient who reached day 90 of ESRD (as shown in Table 3).

Supplemental Table 2. Adjusted Hazard Ratios for Patient Characteristics, Pre-Reform and Reform Periods

| Patient Characteristic*                          | Estimated Hazard Ratio (95% confidence intervals) |                  |                  |                  |                   |                  |
|--------------------------------------------------|---------------------------------------------------|------------------|------------------|------------------|-------------------|------------------|
|                                                  | Discontinuation of PD                             |                  | Mortality        |                  | Combined Outcomes |                  |
|                                                  | Pre-reform                                        | Reform           | Pre-reform       | Reform           | Pre-reform        | Reform           |
| Female                                           | 0.90 (0.85-0.96)                                  | 0.90 (0.86-0.94) | 0.93 (0.85-1.03) | 1.03 (0.96-1.11) | 0.91 (0.86-0.96)  | 0.94 (0.90-0.98) |
| Age (ref. 65-74)                                 |                                                   |                  |                  |                  |                   |                  |
| 18-39                                            | 0.96 (0.86-1.09)                                  | 1.14 (1.04-1.25) | 0.22 (0.16-0.29) | 0.26 (0.21-0.32) | 0.73 (0.66-0.81)  | 0.85 (0.78-0.92) |
| 40-64                                            | 0.90 (0.83-0.98)                                  | 0.96 (0.90-1.02) | 0.55 (0.49-0.63) | 0.55 (0.50-0.61) | 0.78 (0.72-0.83)  | 0.80 (0.76-0.85) |
| 75+                                              | 1.10 (0.98-1.23)                                  | 1.07 (0.98-1.16) | 1.63 (1.44-1.85) | 1.68 (1.53-1.84) | 1.33 (1.22-1.45)  | 1.33 (1.25-1.42) |
| Race (ref. White)                                |                                                   |                  |                  |                  |                   |                  |
| Black                                            | 1.05 (0.97-1.13)                                  | 1.05 (0.99-1.12) | 0.68 (0.59-0.78) | 0.63 (0.57-0.70) | 0.95 (0.88-1.01)  | 0.92 (0.87-0.97) |
| Asian                                            | 0.52 (0.43-0.62)                                  | 0.65 (0.57-0.74) | 0.50 (0.38-0.65) | 0.44 (0.36-0.53) | 0.51 (0.44-0.60)  | 0.58 (0.52-0.64) |
| Am. Indian/Alaskan Native                        | 0.76 (0.56-1.02)                                  | 0.86 (0.69-1.07) | 0.90 (0.58-1.33) | 0.80 (0.56-1.09) | 0.81 (0.63-1.02)  | 0.84 (0.69-1.00) |
| Pacific Islander                                 | 0.82 (0.55-1.17)                                  | 0.78 (0.60-1.00) | 0.46 (0.19-0.89) | 0.55 (0.35-0.83) | 0.71 (0.49-0.98)  | 0.70 (0.55-0.86) |
| Other/ Multi-racial                              | 0.80 (0.47-1.26)                                  | 1.37 (0.79-2.20) | 0.57 (0.20-1.22) | 0.70 (0.22-1.63) | 0.72 (0.46-1.08)  | 1.14 (0.70-1.74) |
| Hispanic                                         | 0.82 (0.74-0.92)                                  | 0.74 (0.68-0.80) | 0.59 (0.48-0.70) | 0.51 (0.44-0.58) | 0.76 (0.69-0.83)  | 0.66 (0.62-0.71) |
| RUCA (ref. Urban)                                |                                                   |                  |                  |                  |                   |                  |
| Large Rural                                      | 1.03 (0.91-1.16)                                  | 1.06 (0.96-1.17) | 1.11 (0.93-1.31) | 1.14 (1.00-1.30) | 1.05 (0.95-1.16)  | 1.08 (1.00-1.17) |
| Small Rural                                      | 1.09 (0.93-1.27)                                  | 0.98 (0.86-1.10) | 1.04 (0.82-1.28) | 0.98 (0.82-1.16) | 1.08 (0.95-1.22)  | 0.97 (0.88-1.08) |
| Isolated Rural                                   | 1.04 (0.86-1.23)                                  | 1.00 (0.87-1.14) | 1.37 (1.10-1.69) | 1.12 (0.93-1.33) | 1.14 (1.00-1.31)  | 1.04 (0.93-1.16) |
| Unknown                                          | 1.73 (0.98-2.79)                                  | 0.79 (0.47-1.23) | 1.56 (0.48-3.69) | 1.52 (0.88-2.40) | 1.70 (1.04-2.62)  | 1.03 (0.71-1.42) |
| BMI (ref. Normal)                                |                                                   |                  |                  |                  |                   |                  |
| Underweight                                      | 1.04 (0.82-1.30)                                  | 1.13 (0.95-1.33) | 1.39 (1.04-1.81) | 1.42 (1.14-1.75) | 1.15 (0.96-1.37)  | 1.22 (1.07-1.39) |
| Overweight                                       | 1.02 (0.94-1.12)                                  | 1.04 (0.97-1.11) | 0.77 (0.68-0.87) | 0.86 (0.79-0.95) | 0.93 (0.87-1.00)  | 0.97 (0.92-1.03) |
| Obese                                            | 1.27 (1.16-1.38)                                  | 1.19 (1.12-1.27) | 0.79 (0.70-0.89) | 0.88 (0.81-0.97) | 1.10 (1.02-1.17)  | 1.09 (1.03-1.15) |
| Missing/OOR                                      | 1.37 (0.98-1.87)                                  | 1.17 (0.87-1.54) | 1.23 (0.70-1.98) | 0.98 (0.60-1.50) | 1.31 (0.98-1.70)  | 1.10 (0.86-1.39) |
| Pre-ESRD Nephrology Care (ref. No)               |                                                   |                  |                  |                  |                   |                  |
| Yes                                              | 0.95 (0.86-1.05)                                  | 0.92 (0.85-0.99) | 0.80 (0.69-0.93) | 0.89 (0.79-0.99) | 0.90 (0.83-0.98)  | 0.91 (0.85-0.96) |
| Unknown                                          | 0.88 (0.75-1.04)                                  | 1.04 (0.91-1.17) | 1.11 (0.88-1.39) | 1.13 (0.94-1.36) | 0.95 (0.83-1.09)  | 1.07 (0.96-1.18) |
| Albumin (ref. 3.1-3.4 g/dL)                      |                                                   |                  |                  |                  |                   |                  |
| 1 to <3.1                                        | 1.07 (0.96-1.19)                                  | 1.21 (1.11-1.31) | 1.20 (1.03-1.41) | 1.23 (1.10-1.39) | 1.10 (1.01-1.21)  | 1.22 (1.14-1.30) |
| >3.4 to 5.5                                      | 0.86 (0.78-0.95)                                  | 0.90 (0.84-0.97) | 0.80 (0.70-0.92) | 0.80 (0.72-0.89) | 0.84 (0.78-0.91)  | 0.87 (0.82-0.92) |
| Missing/OOR                                      | 0.97 (0.88-1.08)                                  | 1.01 (0.93-1.09) | 0.95 (0.81-1.10) | 0.92 (0.82-1.03) | 0.96 (0.88-1.04)  | 0.98 (0.92-1.04) |
| GFR(MDRD) (ref. 5-10 ml/min/1.73m <sup>2</sup> ) |                                                   |                  |                  |                  |                   |                  |
| 2 to <5                                          | 1.08 (0.94-1.24)                                  | 0.98 (0.89-1.08) | 0.89 (0.68-1.15) | 0.84 (0.70-1.01) | 1.04 (0.92-1.17)  | 0.95 (0.87-1.04) |
| >10 to 20                                        | 1.04 (0.97-1.11)                                  | 0.97 (0.92-1.02) | 1.01 (0.91-1.12) | 0.96 (0.89-1.04) | 1.03 (0.97-1.09)  | 0.97 (0.92-1.01) |
| Missing/OOR                                      | 0.87 (0.72-1.04)                                  | 0.97 (0.85-1.10) | 1.75 (1.45-2.09) | 1.37 (1.17-1.58) | 1.20 (1.06-1.36)  | 1.12 (1.02-1.24) |
| Diabetes                                         | 1.29 (1.19-1.40)                                  | 1.32 (1.23-1.41) | 1.80 (1.58-2.06) | 1.72 (1.55-1.91) | 1.40 (1.30-1.50)  | 1.41 (1.34-1.49) |
| Hypertension                                     | 1.04 (0.95-1.13)                                  | 1.04 (0.97-1.12) | 1.30 (1.14-1.50) | 1.17 (1.05-1.30) | 1.10 (1.02-1.18)  | 1.08 (1.02-1.14) |
| Diabetes, Not Cause                              | 1.19 (1.05-1.34)                                  | 1.19 (1.09-1.30) | 1.34 (1.14-1.57) | 1.48 (1.31-1.66) | 1.23 (1.12-1.36)  | 1.27 (1.19-1.37) |

|                             |                  |                  |                  |                  |                  |                  |
|-----------------------------|------------------|------------------|------------------|------------------|------------------|------------------|
| Atherosclerotic Disease     | 0.92 (0.83-1.01) | 1.03 (0.95-1.11) | 1.19 (1.06-1.34) | 1.15 (1.05-1.26) | 1.02 (0.94-1.10) | 1.08 (1.02-1.15) |
| Cardiac Failure             | 1.14 (1.04-1.24) | 1.07 (1.00-1.15) | 1.63 (1.46-1.83) | 1.55 (1.43-1.69) | 1.31 (1.22-1.40) | 1.23 (1.17-1.30) |
| Cerebrovascular Disease     | 1.17 (1.03-1.33) | 1.03 (0.92-1.14) | 1.28 (1.08-1.49) | 1.19 (1.04-1.35) | 1.21 (1.09-1.33) | 1.09 (1.00-1.18) |
| Peripheral Vascular Disease | 0.95 (0.85-1.07) | 1.08 (0.99-1.18) | 1.19 (1.04-1.36) | 1.01 (0.91-1.13) | 1.05 (0.96-1.14) | 1.06 (0.99-1.13) |
| Other Cardiac Condition     | 1.01 (0.92-1.12) | 0.98 (0.91-1.06) | 1.35 (1.20-1.52) | 1.31 (1.20-1.43) | 1.14 (1.05-1.23) | 1.10 (1.04-1.17) |
| Tobacco Use                 | 1.28 (1.13-1.45) | 1.10 (1.00-1.21) | 1.33 (1.10-1.61) | 1.09 (0.94-1.26) | 1.28 (1.16-1.42) | 1.09 (1.01-1.18) |
| Needs Help with ADLs        | 1.04 (0.86-1.24) | 1.31 (1.16-1.48) | 1.49 (1.24-1.79) | 1.74 (1.52-1.99) | 1.25 (1.10-1.42) | 1.48 (1.35-1.62) |
| Current Employment          | 0.95 (0.88-1.03) | 0.87 (0.82-0.93) | 0.91 (0.79-1.04) | 0.77 (0.69-0.86) | 0.95 (0.89-1.02) | 0.85 (0.81-0.90) |
| Medicaid                    | 1.21 (1.11-1.33) | 1.16 (1.08-1.24) | 1.24 (1.07-1.42) | 1.09 (0.98-1.21) | 1.21 (1.12-1.31) | 1.13 (1.07-1.20) |

\*For parameters with multiple groups (e.g., age), the group title row shows the p-value of significance for the overall effect. The models also adjusted for 6-month time intervals within the pre-reform and reform periods.
